# Supplementary material for: Methylene blue removal using a nanomagnetic support: a response surface approach
Source: Royal Society of Chemistry journal article supplement (doi:10.1039/d4na00318g), 2024-01-01
Supplement: d4na00318g1.pdf [file d4na00318g1.pdf]

Supplementary material

S1. Data from review pre fractional factorial design (5<sup>-1</sup>).

| Nanomaterials                                               | Polutants      | Variables                                                                                             | Removal capacity (q)        | Ref.                |
|-------------------------------------------------------------|----------------|-------------------------------------------------------------------------------------------------------|-----------------------------|---------------------|
| Fe <sub>3</sub> O <sub>4</sub> @SiO <sub>2</sub> -Congo Red | Methylene blue | Dye: 3- 27ppm<br>pH: 2- 11<br>Time: 0- 200 min.                                                       | 28 mg. g <sup>-1</sup>      | Yimin, D. et al [1] |
| Fe <sub>3</sub> O <sub>4</sub> @graphene                    | Methylene blue | Dye: 25 mL<br>NPs: 10 mg<br>Time: 0- 120 min.<br>Temp.: 25°C<br>Stirring: 150 rpm                     | 45 mg. g <sup>-1</sup>      | Yao, Y. et al [2]   |
| S-Fe <sub>3</sub> O <sub>4</sub> @poli (DA+ KH550)          | Methylene blue | Dye: 60- 120 ppm<br>NPs: 10 mg<br>pH: 2- 12<br>Time: 0- 120 min.<br>Temp.: 25, 35, 45°C               | 400 mg. g <sup>-1</sup>     | Zhan, Y. et al [3]  |
| Fe <sub>3</sub> O <sub>4</sub> @MCP                         | Methylene blue | Dye: 100- 250 ppm<br>NPs: 0,2- 1 g<br>pH: 3-8<br>Time: 0- 45 min.<br>Temp.: 25°C<br>Stirring: 150 rpm | 70 mg. g <sup>-1</sup>      | Tan, K. et al [4]   |
| Fe <sub>2</sub> O <sub>3</sub> @clinoptilolite              | Methylene blue | Dye: 25- 200 ppm<br>NPs: 0,1- 1 g<br>pH: 3- 9<br>Time: 0- 90 min.                                     | 52 mg. g <sup>-1</sup>      | Badeenezhad, A. [5] |
| HA- Fe <sub>3</sub> O <sub>4</sub>                          | Methylene blue | pH: 3- 11<br>Time: 0- 300 min.                                                                        | 0,291 mmol. g <sup>-1</sup> | Zhang. X [6]        |
| MBF                                                         | Methylene blue | Dye: 5- 20 mg. L <sup>-1</sup><br>NPs: 0,01 g. mL <sup>-1</sup><br>pH: 2- 11<br>Time: 0- 60 min.      | 82,24 mg. g <sup>-1</sup>   | Lou, Z. [7]         |
| Fe <sub>3</sub> O <sub>4</sub> @C                           | Methylene blue | Dye: 0,01- 0,175 g. L <sup>-1</sup><br>NPs: 5 mg<br>pH: 2- 12<br>Temp.: 25°C<br>Stirring: 100 rpm     | 117 mg. g <sup>-1</sup>     | Wu, R. [8]          |
| Fe <sub>3</sub> O <sub>4</sub> @MPG                         | Methylene blue | Dye: 20- 100 mg. L <sup>-1</sup><br>NPs: 3 mg<br>pH: 2- 9<br>Time: 1- 24h<br>Temp.: 25° C- 50°C       | 152 mg. g <sup>-1</sup>     | Wang, X. [9]        |
| Fe <sub>3</sub> O <sub>4</sub> /AC                          | Rhodamine B    | NPs: 0,02 g<br>pH: 4- 10<br>Time: 0- 24h<br>Stirring: 200 rpm                                         | 182,48 mg. g <sup>-1</sup>  | Liu, X. [10]        |
| Fe <sub>3</sub> O <sub>4</sub> HKUST-1                      | Methylene blue | Dye: 200- 1250 mg. L <sup>-1</sup><br>NPs: 30 mg<br>Temp.: 25°C                                       | 1277 mg. g <sup>-1</sup>    | Kubo, M. [11]       |
| Alg- Fe <sub>3</sub> O <sub>4</sub>                         | Methylene blue | Dye: 10- 70 mg. L <sup>-1</sup><br>NPs: 0,01- 0,1 g<br>pH: 2- 12                                      | 47,84 mg. g <sup>-1</sup>   | Mohammadi, A. [12]  |

|                                                                     |                |                                                                                                                                         |                            |                        |
|---------------------------------------------------------------------|----------------|-----------------------------------------------------------------------------------------------------------------------------------------|----------------------------|------------------------|
|                                                                     |                | Time: 0- 120 min.<br>Temp.: 0°C- 70°C<br>Stirring: 120 rpm                                                                              |                            |                        |
| M Fe <sub>3</sub> O <sub>4</sub> /CS                                | X-3B           | NPs: 0,4- 1 g. L <sup>-1</sup><br>pH: 2- 10<br>Time: 0- 120 min.<br>Temp.: 25°C- 45°C<br>Stirring: 180 rpm                              | 476 mg. g <sup>-1</sup>    | Cao, C. [13]           |
| Fe <sub>3</sub> O <sub>4</sub> @PAA                                 | Rhodamine 6G   | NPs: 5 mg<br>pH: 4- 12<br>Time: 0- 90 min.<br>Temp.: 30°C<br>Stirring: 120 rpm                                                          | 55,8 mg. g <sup>-1</sup>   | Xu, Y. [14]            |
| rGO-Fe <sub>2</sub> O <sub>3</sub> - Fe <sub>3</sub> O <sub>4</sub> | Methylene blue | Dye: 20- 500 mg. L <sup>-1</sup><br>NPs: 1 g. L <sup>-1</sup><br>Time: 0- 180 min.<br>Temp.: 37°C<br>Stirring: 100 rpm                  | 72,8 mg. g <sup>-1</sup>   | Saiphaneendra, B. [15] |
| Fe <sub>3</sub> O <sub>4</sub>                                      | Methylene blue | Dye: 10- 20 mg. L <sup>-1</sup><br>NPs: 0,005- 0,025 g<br>pH: 3,5- 8.5<br>Time: 2- 6,8 min.                                             | 91,9 mg. g <sup>-1</sup>   | Ghaedi, M. [16]        |
| Fe <sub>3</sub> O <sub>4</sub> @GTP                                 | Methylene blue | NPs: 0,25-1 g. L <sup>-1</sup><br>pH: 3- 13<br>Time: 0- 18 min.<br>Temp.: 280- 310 K<br>Stirring: 150 rpm                               | 7,25 mg. g <sup>-1</sup>   | Singh, K.K. [17]       |
| Fe <sub>3</sub> O <sub>4</sub> @C                                   | Methylene blue | Dye: 10- 70 mg. L <sup>-1</sup><br>pH: 3- 10<br>Time: 0- 250 min.<br>Stirring: 250 rpm                                                  | 44,38 mg. g <sup>-1</sup>  | Zhang, Z. [18]         |
| Fe <sub>3</sub> O <sub>4</sub> -CP (FMH-CP)                         | Methylene blue | Dye: 10- 1000 mg. L <sup>-1</sup><br>NPs: 5 g. L <sup>-1</sup><br>pH: 8<br>Time: 3 min.<br>Temp.: 25°C<br>Stirring: 200/ 6500 rpm       | 273,83 mg. g <sup>-1</sup> | Rakhshae, R. [19]      |
| Fe <sub>3</sub> O <sub>4</sub> /lignin                              | Methylene blue | Dye: 10 µg. mL <sup>-1</sup><br>NPs: 40, 100, 200 µg. mL <sup>-1</sup><br>pH: 9<br>Time: 0- 90 min.<br>Temp.: 30°C<br>Stirring: 150 rpm | 203,66 mg. g <sup>-1</sup> | Padilha, C. [20]       |
| Fe <sub>3</sub> O <sub>4</sub> @UiO-66                              | Methylene blue | Dye: 20 mg. L <sup>-1</sup><br>NPs: 20 mg<br>Time: 0- 180 min.                                                                          | 205 mg. g <sup>-1</sup>    | Ahmadipouya, S. [21]   |
| Fe <sub>3</sub> O <sub>4</sub> @AC                                  | Methylene blue | Dye: 50 mg. L <sup>-1</sup><br>NPs: 0,01- 0,04 g<br>pH: 2- 10<br>Time: 20- 120 min.<br>Temp.: 27°C<br>Stirring: 200 rpm                 | 138 mg. g <sup>-1</sup>    | Joshi, S. [22]         |
| Fe <sub>3</sub> O <sub>4</sub>                                      | Methylene blue | Dye: 50 mg. L <sup>-1</sup><br>NPs: 50 mg<br>pH: 12<br>Time: 30 min.<br>Temp.: 25°C                                                     | 45,43 mg. g <sup>-1</sup>  | Li, Z., et al. [23]    |

|                                    |                |                                                                                                       |                            |                       |
|------------------------------------|----------------|-------------------------------------------------------------------------------------------------------|----------------------------|-----------------------|
| Fe <sub>3</sub> O <sub>4</sub> @AC | Methylene blue | Dye: 50 mg. L <sup>-1</sup><br>NPs: 10 mg<br>pH: 12<br>Time: 12 h<br>Temp.: 25°C<br>Stirring: 150 rpm | 699.30 mg. g <sup>-1</sup> | Zhang, P., et al.[24] |
|------------------------------------|----------------|-------------------------------------------------------------------------------------------------------|----------------------------|-----------------------|

S2. Variables and levels defined.

| Variables        | Levels        | Ref. (-)                                                   | Ref. (+)                                     |
|------------------|---------------|------------------------------------------------------------|----------------------------------------------|
| Temperature (°C) | 25, 45 °C     | 2, 3, 8, 11, 13, 19,23,24                                  | 3, 4, 9                                      |
| pH               | 5, 9          | 1, 3, 4, 5, 6, 7, 8, 9, 10, 12, 13, 14, 16, 17, 22         | 1, 3, 5, 6, 7, 8, 10, 12, 13, 14, 17, 18, 22 |
| Time             | 1, 20 min     | 1, 2, 3, 4, 5, 6, 7, 9, 10, 12, 14, 15, 16, 17, 18, 20, 21 | 1, 2, 4, 5, 7, 12, 14, 20, 21                |
| Agitation        | 100, 1000 rpm | 2, 17, 20                                                  |                                              |
| Mass             | 10, 100 mg    | 2, 3, 7, 12, 15, 16, 19, 22                                | 5, 13, 15, 17, 19                            |

S3. Design matrix of fractional factorial (5<sup>-1</sup>).

| Test | Time (min) | Temperature (°C) | pH | Adsorbent (g) | Agitation (rpm) |
|------|------------|------------------|----|---------------|-----------------|
| 1    | 1 (-)      | 25(-)            | 5  | 10            | 300             |
| 2    | 20(+)      | 25(-)            | 5  | 10            | 100             |
| 3    | 1 (-)      | 40(+)            | 5  | 10            | 100             |
| 4    | 20(+)      | 40(+)            | 5  | 10            | 300             |
| 5    | 1 (-)      | 25(-)            | 9  | 10            | 100             |
| 6    | 20(+)      | 25(-)            | 9  | 10            | 300             |
| 7    | 1(-)       | 40(+)            | 9  | 10            | 300             |
| 8    | 20(+)      | 40(+)            | 9  | 10            | 100             |
| 9    | 1(-)       | 25(-)            | 5  | 100           | 100             |
| 10   |            | 25(-)            | 5  | 100           | 300             |
|      | 20(+)      |                  |    |               |                 |
| 11   | 1 (-)      | 40(+)            | 5  | 100           | 300             |
| 12   | 20(+)      | 40(+)            | 5  | 100           | 100             |
| 13   | 1(-)       | 25(-)            | 9  | 100           | 300             |
|      | )          |                  |    |               |                 |
| 14   | 20(+)      | 25(-)            | 9  | 100           | 100             |
| 15   | 1 (-)      | 40(+)            | 9  | 100           | 100             |
| 16   | 20(+)      | 40(+)            | 9  | 100           | 300             |

S4. Design matrix of full factorial (2<sup>3</sup>).

| Test | Time (min) | Temperature (°C) |
|------|------------|------------------|
| 1    | 1 (-)      | 20(-)            |
| 2    | 31(0)      | 20(-)            |

|    |        |       |
|----|--------|-------|
| 3  | 61 (+) | 20(-) |
| 4  | 1 (-)  | 30(0) |
| 5  | 31(0)  | 30(0) |
| 6  | 61 (+) | 30(0) |
| 7  | 1 (-)  | 40(+) |
| 8  | 31(0)  | 40(+) |
| 9  | 61 (+) | 40(+) |
| 10 | 31(0)  | 30(0) |
| 11 | 31(0)  | 30(0) |

## References

- Yimin, D., Jiaqi, Z., Danyang, L., Lanli, N., Liling, Z., Yi, Z., & Xiaohong, Z. (2018). Preparation of Congo red functionalized Fe<sub>3</sub>O<sub>4</sub>@SiO<sub>2</sub> nanoparticle and its application for the removal of methylene blue. *Colloids and Surfaces A: Physicochemical and Engineering Aspects*, 550, 90–98. doi:10.1016/j.colsurfa.2018.04.033
- Yao, Y., Miao, S., Liu, S., Ma, L. P., Sun, H., & Wang, S. (2012). Synthesis, characterization, and adsorption properties of magnetic Fe<sub>3</sub>O<sub>4</sub>@graphene nanocomposite. *Chemical Engineering Journal*, 184, 326–332. doi:10.1016/j.cej.2011.12.017
- Zhan, Y., Zhao, S., Wan, X., & He, S. (2019). Hierarchical Fe<sub>3</sub>O<sub>4</sub> derived organic/inorganic hybrids constructed by modified bio-inspired functionalization: efficient adsorbents for water-soluble methylene blue and mechanism. *Journal of Chemical Technology & Biotechnology*. doi:10.1002/jctb.5933
- Tan, K. A., Morad, N., Teng, T. T., Norli, I., & Panneerselvam, P. (2012). Removal of Cationic Dye by Magnetic Nanoparticle (Fe<sub>3</sub>O<sub>4</sub>) Impregnated onto Activated Maize Cob Powder and Kinetic Study of Dye Waste Adsorption. *APCBEE Procedia*, 1, 83–89. doi:10.1016/j.apcbee.2012.03.015
- Badeenezhad, A., Azhdarpoor, A., Bahrami, S., & Yousefinejad, S. (2019). Removal of methylene blue dye from aqueous solutions by natural clinoptilolite and clinoptilolite modified by iron oxide nanoparticles. *Molecular Simulation*, 1–8. doi:10.1080/08927022.2018.1564077
- Zhang, Xian; Zhang, Panyue; Wu, Zhen; Zhang, Ling; Zeng, Guangming; Zhou, Chunjiao (2013). Adsorption of methylene blue onto humic acid-coated Fe<sub>3</sub>O<sub>4</sub> nanoparticles. *Colloids and Surfaces A: Physicochemical and Engineering Aspects*, 435(), 85–90. doi:10.1016/j.colsurfa.2012.12.056
- Lou, Zhichao; Zhou, Zhiwei; Zhang, Wei; Zhang, Xiaohong; Hu, Xiaodan; Liu, Peidang; Zhang, Haiqian (2015). Magnetized bentonite by Fe<sub>3</sub>O<sub>4</sub> nanoparticles treated as adsorbent for methylene blue removal from aqueous solution: Synthesis, characterization, mechanism, kinetics and regeneration. *Journal of the Taiwan Institute of Chemical Engineers*, 49(), 199–205. doi:10.1016/j.jtice.2014.11.007
- Wu, Ruihan; Liu, Jia-Hui; Zhao, Lianqin; Zhang, Xiaoliang; Xie, Jingru; Yu, Baowei; Ma, Xinlei; Yang, Sheng-Tao; Wang, Haifang; Liu, Yuanfang (2014). Hydrothermal preparation of magnetic Fe<sub>3</sub>O<sub>4</sub>@C nanoparticles for dye adsorption. *Journal of Environmental Chemical Engineering*, 2(2), 907–913. doi:10.1016/j.jece.2014.02.005
- Wang, Xiaowen; Zhang, Yuyuan; Shan, Rui; Hu, Huawen (2020). Polydopamine interface encapsulating graphene and immobilizing ultra-small, active Fe<sub>3</sub>O<sub>4</sub> nanoparticles for organic dye adsorption. *Ceramics International*, (), S0272884220328649–. doi:10.1016/j.ceramint.2020.09.160
- Liu, Xiaoduo; Tian, Jiefu; Li, Yuanyuan; Sun, Ningfei; Mi, Shu; Xie, Yong; Chen, Ziyu (2019). Enhanced dyes adsorption from wastewater via Fe<sub>3</sub>O<sub>4</sub> nanoparticles functionalized activated carbon. *Journal of Hazardous Materials*, 373(), 397–407. doi:10.1016/j.jhazmat.2019.03.103
- Kubo, Masaru; Moriyama, Reina; Shimada, Manabu (2019). Facile fabrication of HKUST-1 nanocomposites incorporating Fe<sub>3</sub>O<sub>4</sub> and TiO<sub>2</sub> nanoparticles by a spray-assisted synthetic process and their dye adsorption performances. *Microporous and Mesoporous Materials*, 280(), 227–235. doi:10.1016/j.micromeso.2019.02.010
- Mohammadi, Abbas; Daemi, Hamed; Barikani, Mehdi (2014). Fast removal of malachite green dye using novel superparamagnetic sodium alginate-coated Fe<sub>3</sub>O<sub>4</sub> nanoparticles. *International Journal of Biological Macromolecules*, 69(), 447–455. doi:10.1016/j.ijbiomac.2014.05.042
- Cao, Chunhua; Xiao, Ling; Chen, Chunhua; Shi, Xiaowen; Cao, Qihua; Gao, Lin (2014). In situ preparation of magnetic Fe<sub>3</sub>O<sub>4</sub>/chitosan nanoparticles via a novel reduction–precipitation method and their application in adsorption of reactive azo dye. *Powder Technology*, 260(), 90–97. doi:10.1016/j.powtec.2014.03.025

14. Yin-Yin Xu; Min Zhou; Hui-Juan Geng; Jun-Jie Hao; Qian-Qian Ou; Sheng-Da Qi; Hong-Li Chen; Xing-Guo Chen (2012). A simplified method for synthesis of Fe<sub>3</sub>O<sub>4</sub>@PAA nanoparticles and its application for the removal of basic dyes. 258(8), 0–3902. doi:10.1016/j.apsusc.2011.12.054
15. Saiphaneendra, B.; Saxena, Tejas; Singh, Satyapaul A.; Madras, Giridhar; Srivastava, Chandan (2016). Synergistic effect of co-existence of hematite ( $\alpha$ -Fe<sub>2</sub>O<sub>3</sub>) and magnetite (Fe<sub>3</sub>O<sub>4</sub>) nanoparticles on graphene sheet for dye adsorption. Journal of Environmental Chemical Engineering, (), S2213343716304092–. doi:10.1016/j.jece.2016.11.017
16. Ghaedi, M.; Hajjati, S.; Mahmudi, Z.; Tyagi, I.; Agarwal, Shilpi; Maity, A.; Gupta, V.K. (2015). Modeling of competitive ultrasonic assisted removal of the dyes – Methylene blue and Safranin-O using Fe<sub>3</sub>O<sub>4</sub> nanoparticles. Chemical Engineering Journal, 268(), 28–37. doi:10.1016/j.cej.2014.12.090
17. Singh, K.K.; Senapati, K.K.; Sarma, K.C. (2017). Synthesis of superparamagnetic Fe<sub>3</sub>O<sub>4</sub> Nanoparticles coated with green tea polyphenols and their use for removal of dye pollutant from aqueous solution. Journal of Environmental Chemical Engineering, (), S2213343717301586–. doi:10.1016/j.jece.2017.04.022
18. Zhengyong Zhang; Jilie Kong (2011). Novel magnetic Fe<sub>3</sub>O<sub>4</sub>@C nanoparticles as adsorbents for removal of organic dyes from aqueous solution. 193(none), 325–329. doi:10.1016/j.jhazmat.2011.07.033
19. Rakhshaei, Roohan; Noorani, Yasaman (2016). Comparing three methods of simultaneous synthesis and stabilization of Fe<sub>3</sub>O<sub>4</sub> nano particles: Changing physicochemical properties of products to improve kinetic and thermodynamic of dye adsorption. Journal of Magnetism and Magnetic Materials, (), S0304885316316432–. doi:10.1016/j.jmmm.2016.08.078
20. De Araújo Padilha, C. E., da Costa Nogueira, C., de Santana Souza, D. F., de Oliveira, J. A., & dos Santos, E. S. (2020). Organosolv lignin/Fe<sub>3</sub>O<sub>4</sub> nanoparticles applied as a  $\beta$ -glucosidase immobilization support and adsorbent for textile dye removal. Industrial Crops and Products, 146, 112167. doi:10.1016/j.indcrop.2020.112167
21. Ahmadipouya, S., Haris, M. H., Ahmadijokani, F., Jarahiyan, A., Molavi, H., Moghaddam, F. M., ... Arjmand, M. (2020). Magnetic Fe<sub>3</sub>O<sub>4</sub>@UiO-66 nanocomposite for rapid adsorption of organic dyes from aqueous solution. Journal of Molecular Liquids, 114910. doi:10.1016/j.molliq.2020.114910
22. Joshi, Seema; Garg, V.K.; Kataria, Navish; Kadirvelu, K. (2019). Applications of Fe<sub>3</sub>O<sub>4</sub>@AC nanoparticles for dye removal from simulated wastewater. Chemosphere, (), S0045653519314912–. doi:10.1016/j.chemosphere.2019.07.011
23. Li, Z., Sun, Y., Xing, J., & Meng, A. (2019). Fast Removal of Methylene Blue by Fe<sub>3</sub>O<sub>4</sub> Magnetic Nanoparticles and Their Cycling Property. Journal of Nanoscience and Nanotechnology, 19(4), 2116–2123. doi:10.1166/jnn.2019.15809;
24. Zhang, P., Lo, I., O'Connor, D., Pehkonen, S., Cheng, H., & Hou, D. (2017). High efficiency removal of methylene blue using SDS surface-modified ZnFe<sub>2</sub>O<sub>4</sub> nanoparticles. Journal of Colloid and Interface Science, 508, 39–48. doi:10.1016/j.jcis.2017.08.025
25. Debrassi, A., Corrêa, A. F., Baccarin, T., Nedelko, N., Ślawska-Waniewska, A., Sobczak, K., Rodrigues, C. A. (2012). Removal of cationic dyes from aqueous solutions using N-benzyl-O-carboxymethylchitosan magnetic nanoparticles. Chemical Engineering Journal, 183, 284–293. doi:10.1016/j.cej.2011.12.078
